# Supplementary material
Source: publisher figshare collection journal article supplement (https://gsapubs.figshare.com/ndownloader/files/23300390)

# Stratigraphy and physical parameters of the Plinian phase of the Campanian Ignimbrite eruption

**Claudio Scarpati<sup>†</sup> and Annamaria Perrotta**

*Dipartimento di Scienze della Terra, dell'Ambiente e delle Risorse. Università di Napoli 'Federico II'. Largo San Marcellino 10, 80138 Napoli Italy*

<sup>†</sup>claudio.scarpati@unina.it

## GEOCHEMICAL BACKGROUND

The CI products range in composition from trachytic to trachyphonolitic (Di Girolamo 1970; Barberi et al. 1978; Civetta et al. 1997; Pappalardo et al. 2002; Fowler et al. 2007). Crystallization and differentiation processes active in the stratified magma chamber are discussed by many authors (Arienzo et al., 2009; 2011; Bohrsen et al., 2006; Civetta et al., 1997; Fedele et al., 2008; Fowler et al., 2007; Pappalardo et al., 2002; 2008; Rosi and Sbrana, 1987; Signorelli et al., 1999; 2001). Abrupt changes in composition, properties and physical state in the melt (Fowler et al., 2007) or overpressure in the magma chamber (Pappalardo et al., 2008) triggered the eruption. A reconstruction of conduit dynamics during the early phase of the CI eruption is discussed by Polacci et al. (2003) on the basis of density measurements and textural investigations of the juvenile fraction. The origin of pumice clasts with different textural characteristics is ascribed to the development of conduit regions marked by different rheological behaviors.

## METHODS

### Grain Size and Component Analyses

Grain size analyses have been performed on bulk samples taken from each recognized layer. Graded (B and D) and thick ungraded (A and lower proximal) layers were sampled at both the base and top, and at regular intervals throughout the deposit; thin massive (C) layers and single strata of stratified unit (E and upper proximal) were sampled in the middle. Sieve analyses at 1-phi intervals were performed on the size fraction coarser than 1/16 mm. Component analyses have been performed by hand-picking in the coarse fraction (> 2 mm) and by grain-counting in the 125–1000 µm fraction.

The maximum clast size (maximum pumice, MP; maximum lithic, ML) at each location was determined in the field by measuring and averaging the long axes of five clasts collected from each layer. Multiple samples were collected, at different stratigraphic heights, within graded layers to quantify the observed grain size variations (Fig. 7).

Components were separated and weighed down to  $-1\phi$ , while the fraction down to  $+3\phi$  was analyzed using a binocular microscope and counting 500 grains for each phi interval. The statistics shown in this paper are based on the classification of several hundreds of thousands of pyroclasts.

## Density Measurements

### *Clasts Density*

We have measured the density of 5–10 pumice clasts from each layer in eight different locations at different distances and azimuth from the vent, with an aim to describe vertical and lateral variation of this parameter

### *Deposit Density*

Densities of the different lapilli layers were calculated by pouring the weighed samples into a graduated container and tapping until a constant volume is achieved. For each sample we have measured the density of loosely packed clasts (just poured into the container), thickening packed clasts (slightly tapped into the container) and closely packed clasts (using a sieve shaker). In this way we have obtained three values for each sample corresponding to uncompacted, lightly compacted and strongly compacted deposits.

## Isopachs and Isopleths

To map the distribution of PPF deposit we have measured the thickness of each layer in 49 exposures, most excavated for this study. Maximum clast sizes for pumice (MP) and lithic clasts (ML) were systematically collected for all layers. Additional measurements were taken in graded layers B and D to better represent the vertical trend of these parameters within each single bed.

## Classification

To classify the sustained phase of the CI eruption, different methods were applied. Pyle's (1989) classification is based on two parameters  $b_c$  and  $b_t$  (average distance over which the thickness and the maximum clast sizes diminish by one half),

$$b_c = \ln 2 / (k_c \sqrt{\pi}) \text{ and } b_t = \ln 2 / (k_t \sqrt{\pi}),$$

where  $k_c$  and  $k_t$  are respectively the slopes on a  $\ln(\text{maximum clast size})$  vs  $\text{area}^{1/2}$  and  $\ln(\text{thickness})$  vs  $\text{area}^{1/2}$  plots. In general,  $b_c$  values greater than 3 indicate plinian dispersal.

Jurado-Chichay and Walker (2001) proposed that the destructive potential of a plinian eruption is related to its dispersal and magnitude and is dependent upon the thickness of the fall deposit. Following Walker (1980), they assumed the area enclosed by the 1 m isopach would be a threshold marking an area within which all properties would be entirely destroyed. Cole and Scarpati (2010) suggest that load pressure is a better parameter with which define volcanic hazard related to tephra fall because it is dependent not only on thickness but also on deposit density (related to component abundances and particle packing density).

## REFERENCES CITED

- Arienzo, I., Civetta, L., Heumann, A., Wörner, G., and Orsi, G., 2009, Isotopic evidence for open system processes within the Campanian Ignimbrite (Campi Flegrei Italy) magma chamber: *Bulletin of Volcanology*, v. 71, p. 285–300, doi:10.1007/s00445-008-0223-0.
- Arienzo, I., Heumann, A., Wörner, G., Civetta, L., and Orsi, G., 2011, Processes and timescales of magma evolution prior to the Campanian Ignimbrite eruption (Campi Flegrei, Italy): *Earth and Planetary Science Letters*, v. 306, p. 217–228, doi:10.1016/j.epsl.2011.04.002.
- Barberi, F., Innocenti, F., Lirer, L., Munno, R., Pescatore, T., and Santacroce, R., 1978, The Campanian Ignimbrite: a major prehistoric eruption in the neapolitan area (Italy): *Bulletin of Volcanology*, v. 41, p. 1–22.
- Bohrson, W.A., Spera, F.J., Fowler, S.J., Belkin, H.E., De Vivo, B., and Rolandi, G., 2006, Petrogenesis of the Campanian Ignimbrite: implications for crystal-melt separation and open-system processes from major and trace elements and Th (?) isotopic data, *in* De Vivo, B., ed., *Volcanism in the Campania Plain: Vesuvius, Campi Flegrei and Ignimbrites. Developments in Volcanology*, v. 9, p. 249–288, doi:10.1016/S1871-644X(06)80027-6.
- Civetta, L., Orsi, G., Pappalardo, L., Fisher, R.V., Heiken, G., and Ort, M., 1997, Geochemical zoning, mingling, eruptive dynamics and depositional processes - The Campanian Ignimbrite, Campi Flegrei caldera, Italy: *Journal of Volcanology and Geothermal Research*, v. 75, p. 183–219, doi:10.1016/S0377-0273(96)00027-3.
- Cole, P.D., and Scarpati, C., 2010, The eruption of Vesuvius 1944: combining contemporary accounts and a new volcanological reconstruction: *Geological Magazine*, v. 1, p. 1–25, doi:10.1017/S0016756809990495.
- Di Girolamo, P., 1970, differenziazione gravitativa e curve isochimiche nell'Ignimbrite Campana: *Rendiconti della Società Italiana di Mineralogia e Petrografia*, v. 26, p. 547–588.
- Fedele, L., Scarpati, C., Lamphere, M., Melluso, L., Morra, V., Perrotta, A., and Ricci, G., 2008, The Breccia Museo formation, Campi Flegrei, southern Italy: geochronology, chemostratigraphy and relationship with the Campanian Ignimbrite eruption: *Bulletin of Volcanology*, v. 70, p. 1189–1219, doi:10.1007/s00445-008-0197-y.
- Fowler, S.J., Spera, F.J., Bohrson, W.A., Belkin, H.E., and De Vivo, B., 2007, Phase equilibria constraints on the chemical and physical evolution of the Campanian Ignimbrite: *Journal of Petrology*, v. 48, p. 459–493, doi:10.1093/petrology/egl068.
- Jurado-Chichay, Z., and Walker, G.P.L., 2001, Variability of Plinian fall deposits: examples from Okataina Volcanic Centre, New Zealand: *Journal of Volcanology and Geothermal Research*, v. 111, p. 239–263, doi:10.1016/S0377-0273(01)00229-3.
- Pappalardo, L., Civetta, L., de Vita, S., Di Vito, M.A., Orsi, G., Carandente, A., and Fisher, R.V., 2002, Timing of magma extraction during the Campanian Ignimbrite eruption (Campi Flegrei caldera): *Journal of Volcanology and Geothermal Research*, v. 114, p. 479–497, doi:10.1016/S0377-0273(01)00302-X.
- Pappalardo, L., Ottolini, A.E., and Mastrolorenzo, G., 2008, The Campanian Ignimbrite (southern Italy) geochemical zoning: Insight on the generation of a super-eruption from catastrophic differentiation and fast withdrawal: *Contributions to Mineralogy and Petrology*, v. 156, p. 1–26, doi:10.1007/s00410-007-0270-0.
- Polacci, M., Pioli, L., and Rosi, M., 2003, The Plinian phase of the Campanian Ignimbrite eruption (Phlegrean Fields, Italy): evidence from density measurements and textural

Scarpati, C., and Perrotta, A., 2016, Stratigraphy and physical parameters of the Plinian phase of the Campanian Ignimbrite eruption: GSA Bulletin, doi:10.1130/B31331.1.

characterisation of pumice: Bulletin of Volcanology, v. 65, p. 418–432, doi:10.1007/s00445-002-0268-4.

Pyle, D.M., 1989, The thickness, volume and grainsize of tephra fall deposits: Bulletin of Volcanology, v. 51, p. 1–15, doi:10.1007/BF01086757.

Rosi, M., and Sbrana, A., 1987, The Phlegrean Fields: Quaderni de La Ricerca Scientifica 114, 175 p.

Signorelli, S., Vaggelli, G., Francalanci, L., and Rosi, M., 1999, Origin of magmas feeding the Plinian phase of the Campanian Ignimbrite eruption, Phlegrean Fields (Italy): constraints based on matrix glass and glass-inclusion compositions: Journal of Volcanology and Geothermal Research, v. 91, p. 199–220, doi:10.1016/S0377-0273(99)00036-0.

Signorelli, S., Vaggelli, G., Romano, C., and Carroll, M.R., 2001, Volatile element zonation in Campanian Ignimbrite magmas (Phlegrean Fields, Italy): evidence from the study of glass inclusions and matrix glasses: Contributions to Mineralogy and Petrology, v. 140, p. 543–553, doi:10.1007/s004100000213.

Walker, G.P.L., 1980, The Taupo pumice: product of the most powerful known (ultraPlinian) eruption?: Journal of Volcanology and Geothermal Research, v. 8, p. 69–94, doi:10.1016/0377-0273(80)90008-6.

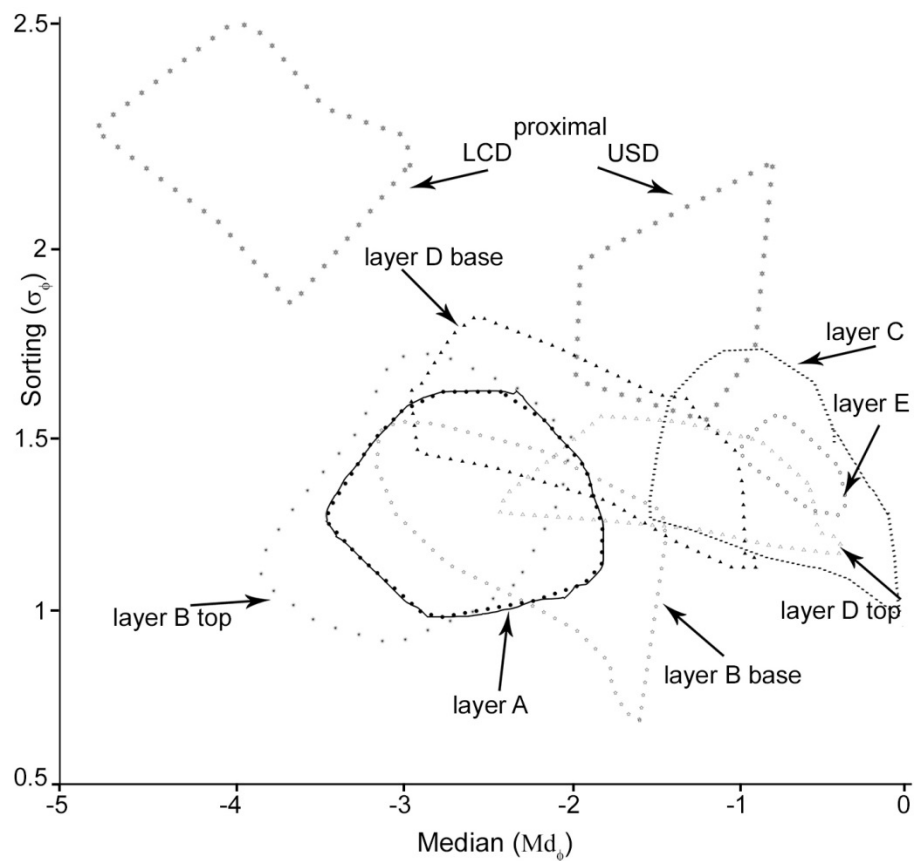

Figure DR1. Grain size parameters for CI fall layers in proximal and medial deposits.

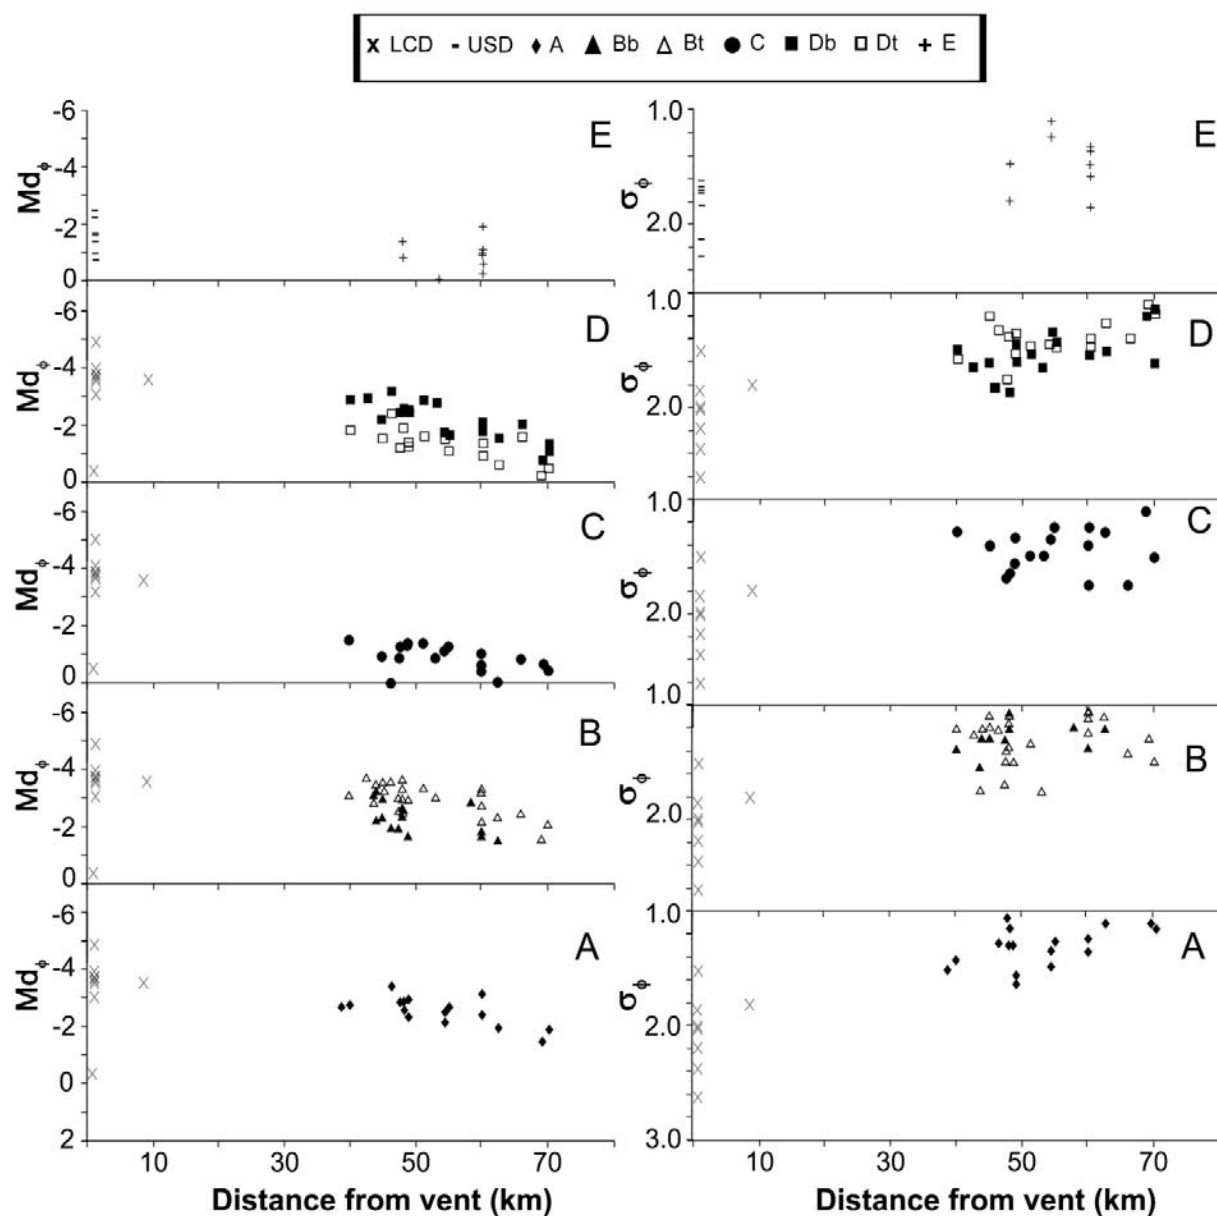

Figure DR2. Plots of median and sorting parameters of the CI fall layers A-E with increasing distance from vent. Proximal deposit: LCD (Lower Coarse lapilli Deposit), USD (Upper Stratified Deposit); medial deposit: Layers A-E. b—base (black symbol), t—top (white symbol).

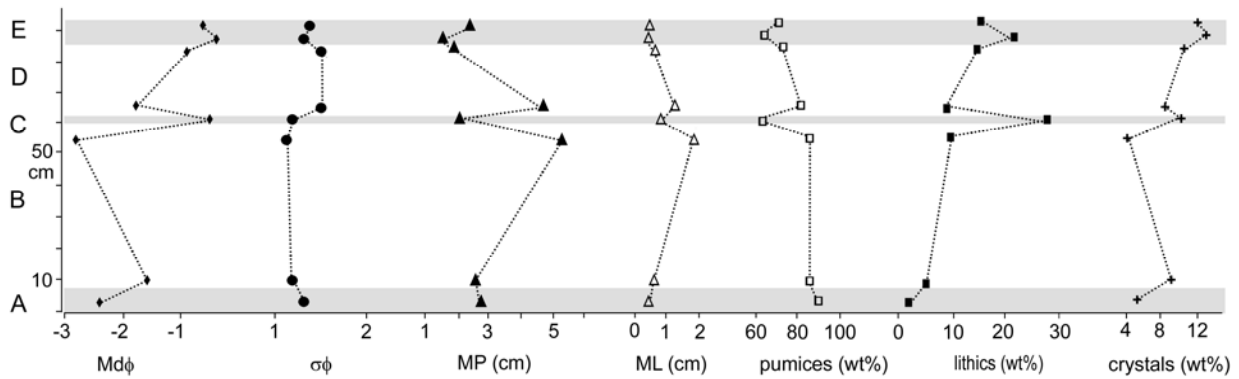

Figure DR3. Vertical variation in grain-size parameters and components in a composite section (layers A to D from Montoro and layer E from Penta). Median diameter ( $Md_\phi$ ); sorting ( $\sigma_\phi$ ); maximum pumice diameter (MP, average of the five largest pumice clasts); maximum lithic diameter (ML, average of the 5 largest lithic clasts); weight % of pumice clasts (pumices); weight % of lithic clasts (lithics); weight % of crystals (crystals).

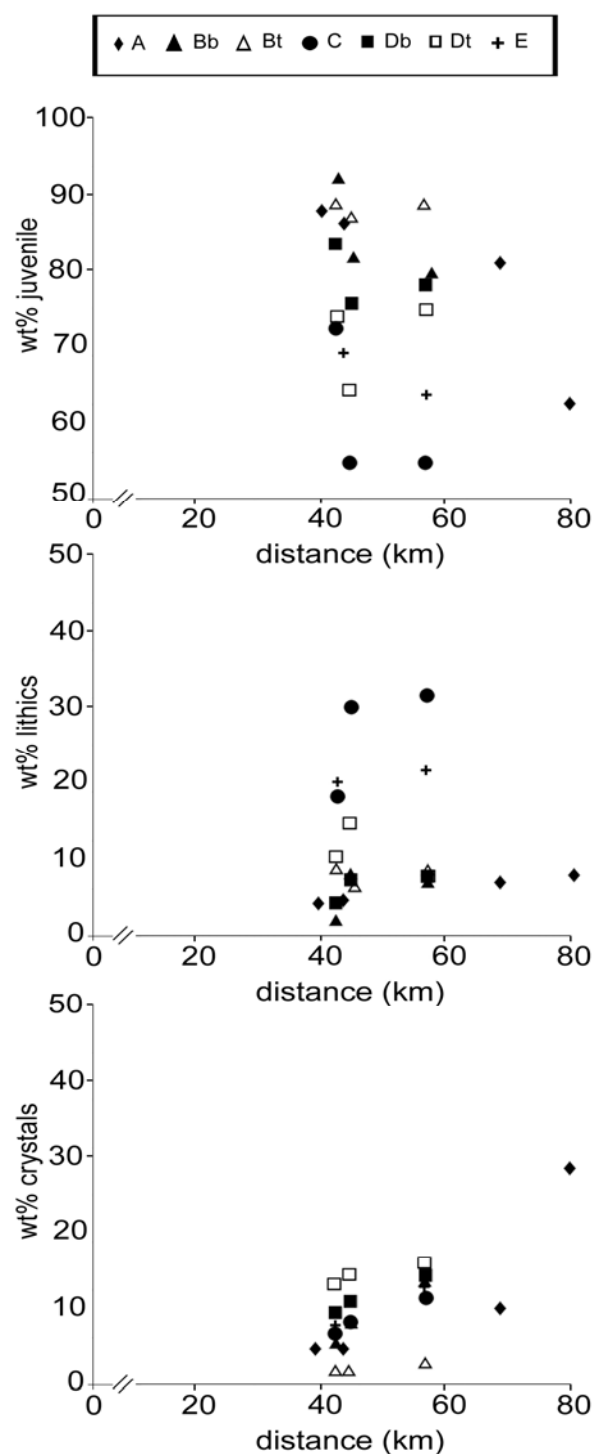

Figure DR4. Component variation with distance from vent for CI fall layers. Note the decrease in juvenile and increase in heavy components in all sampled locations. To avoid distortion of the main trend we have plotted only data from sections close to the dispersal axis of each layer.



*(On following 6 pages.)*

Figure DR5. Grainsize and componentry histograms of all samples collected in CI fall deposit. Samples are arranged for sections (located in figure 3). Black boxes indicate accidental lithic component, white and dotted boxes indicate juvenile and loose crystal components, respectively. Grey boxes represent not analyzed sizes ( $<1/16$  mm). Pie diagrams show the relative abundance of the four components.

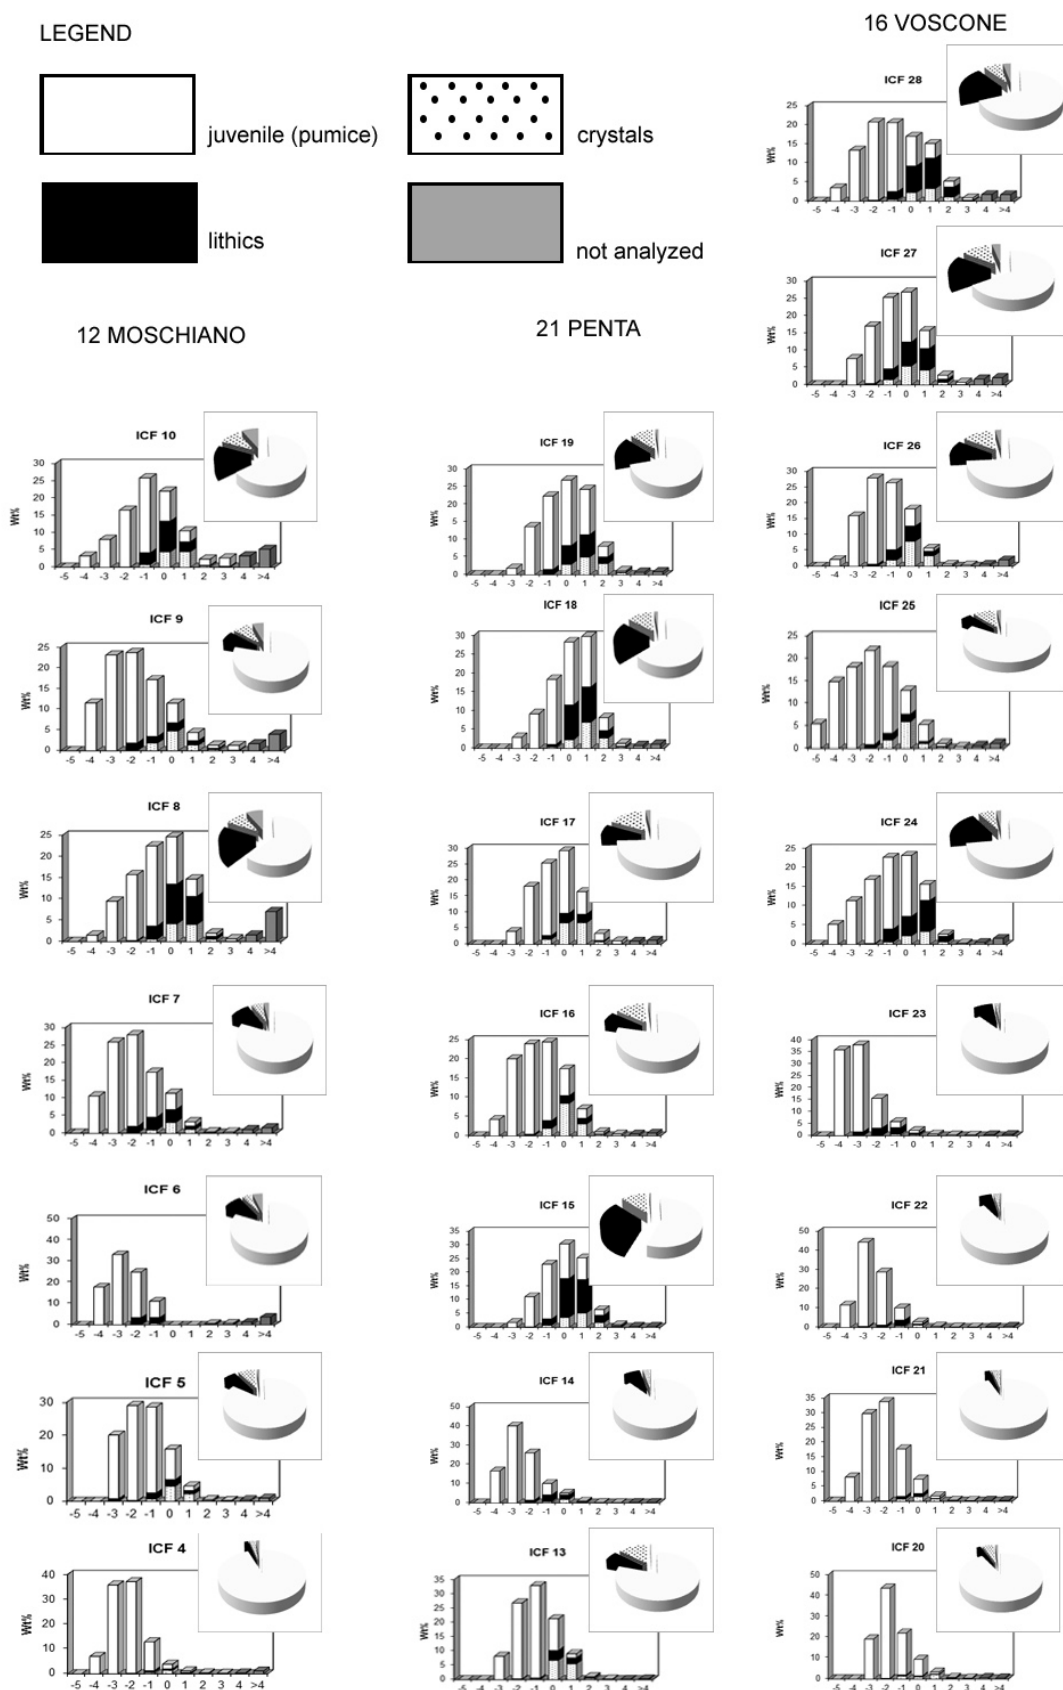

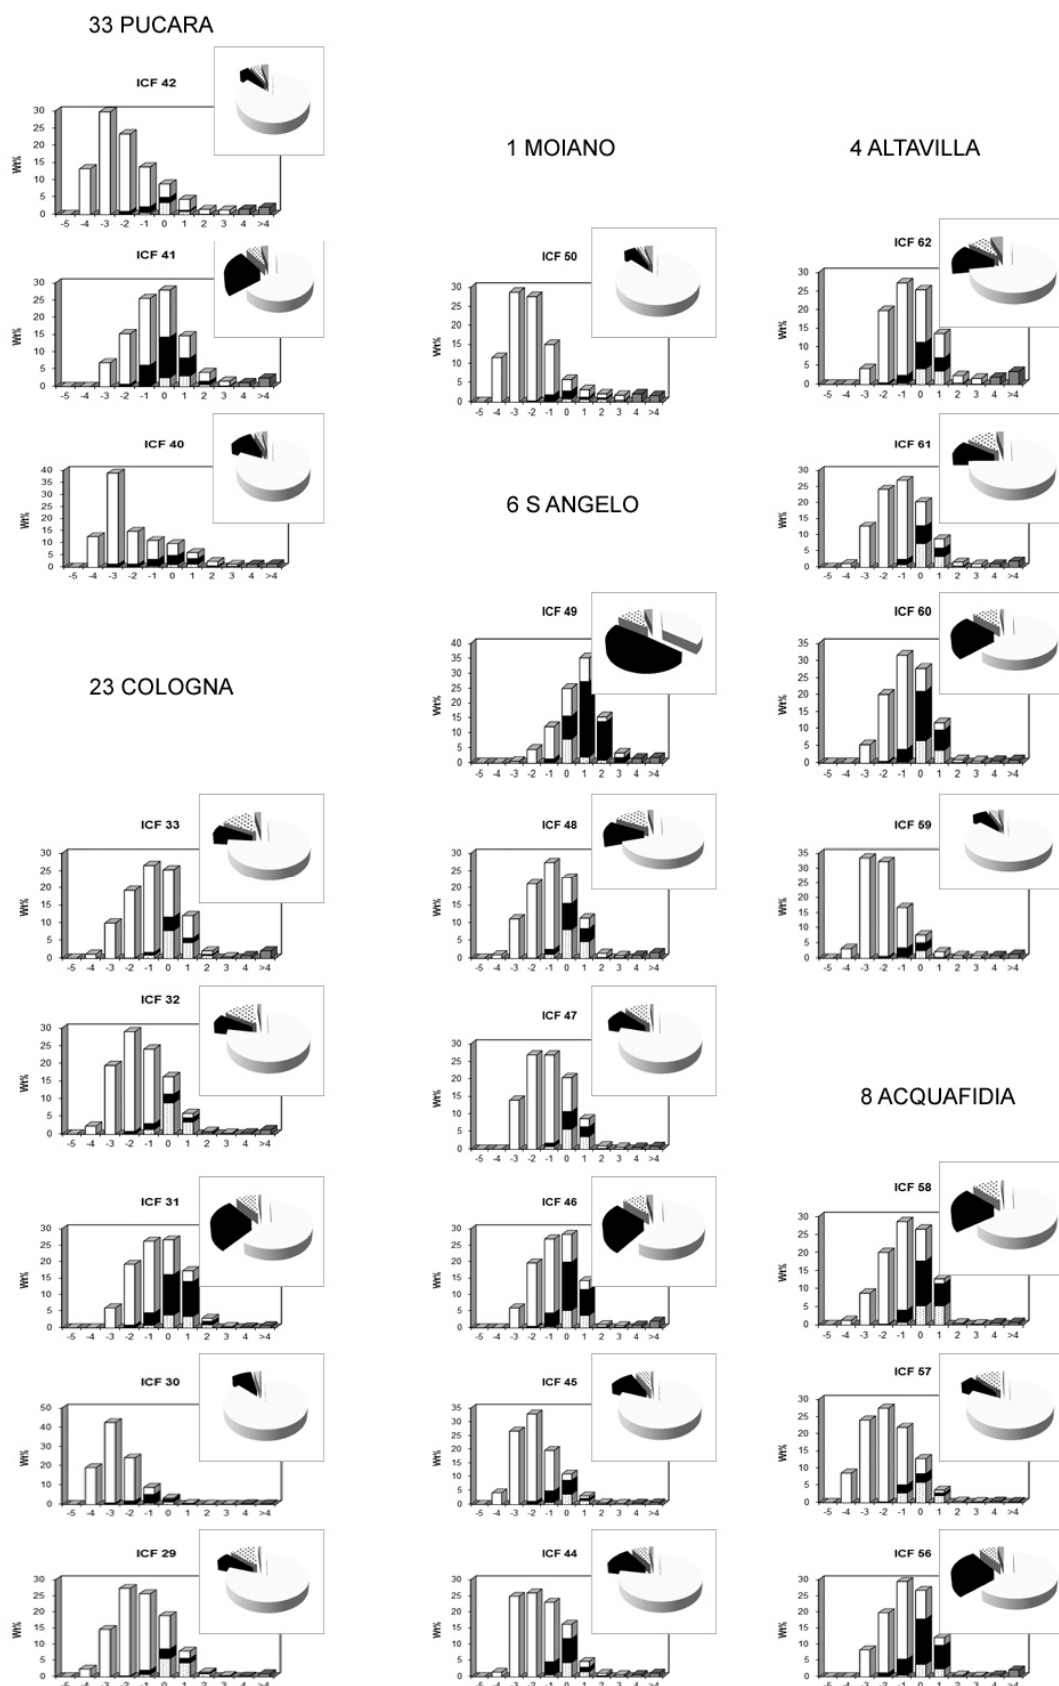

### 7 VISCIANO

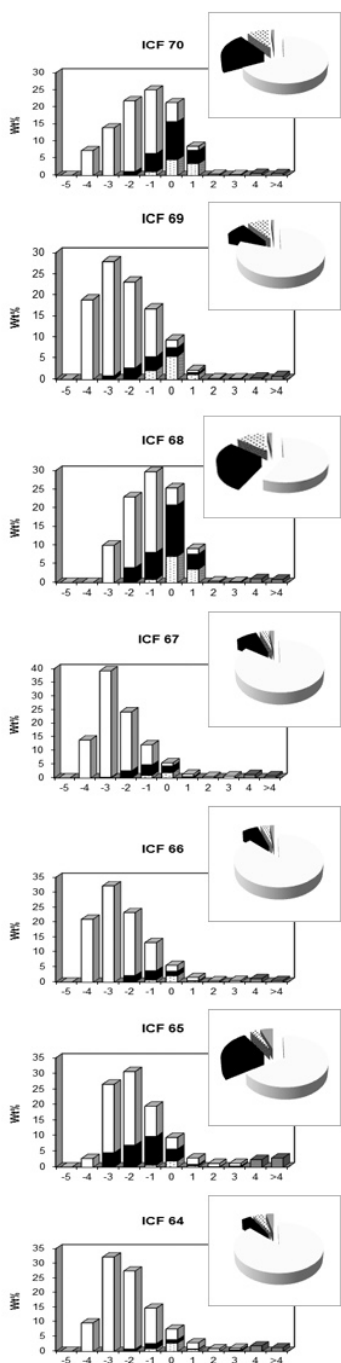

### 9 MUGNANO

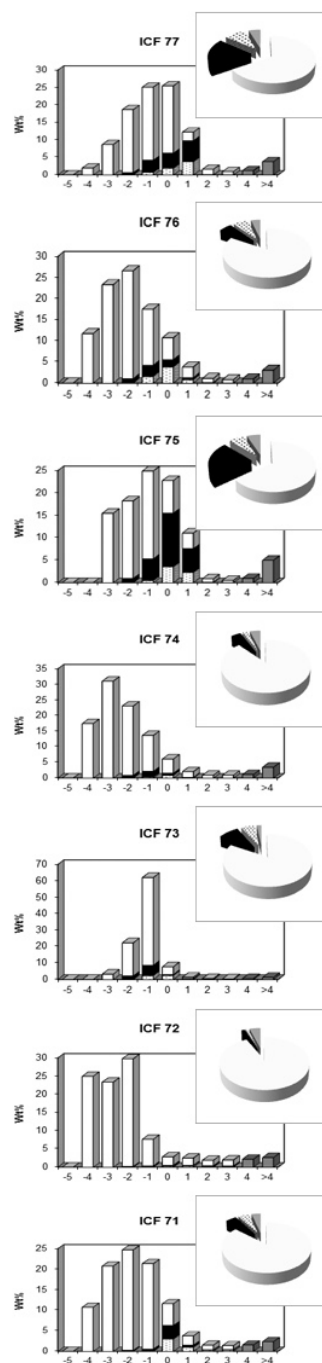

### 10 MUGNANO 2

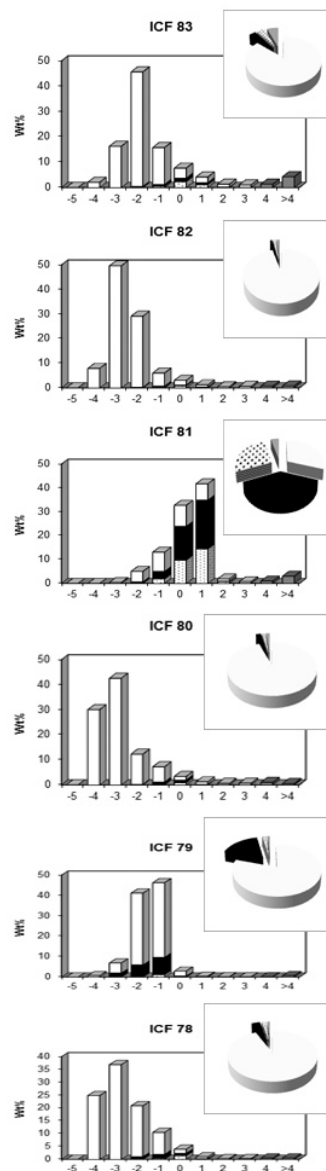

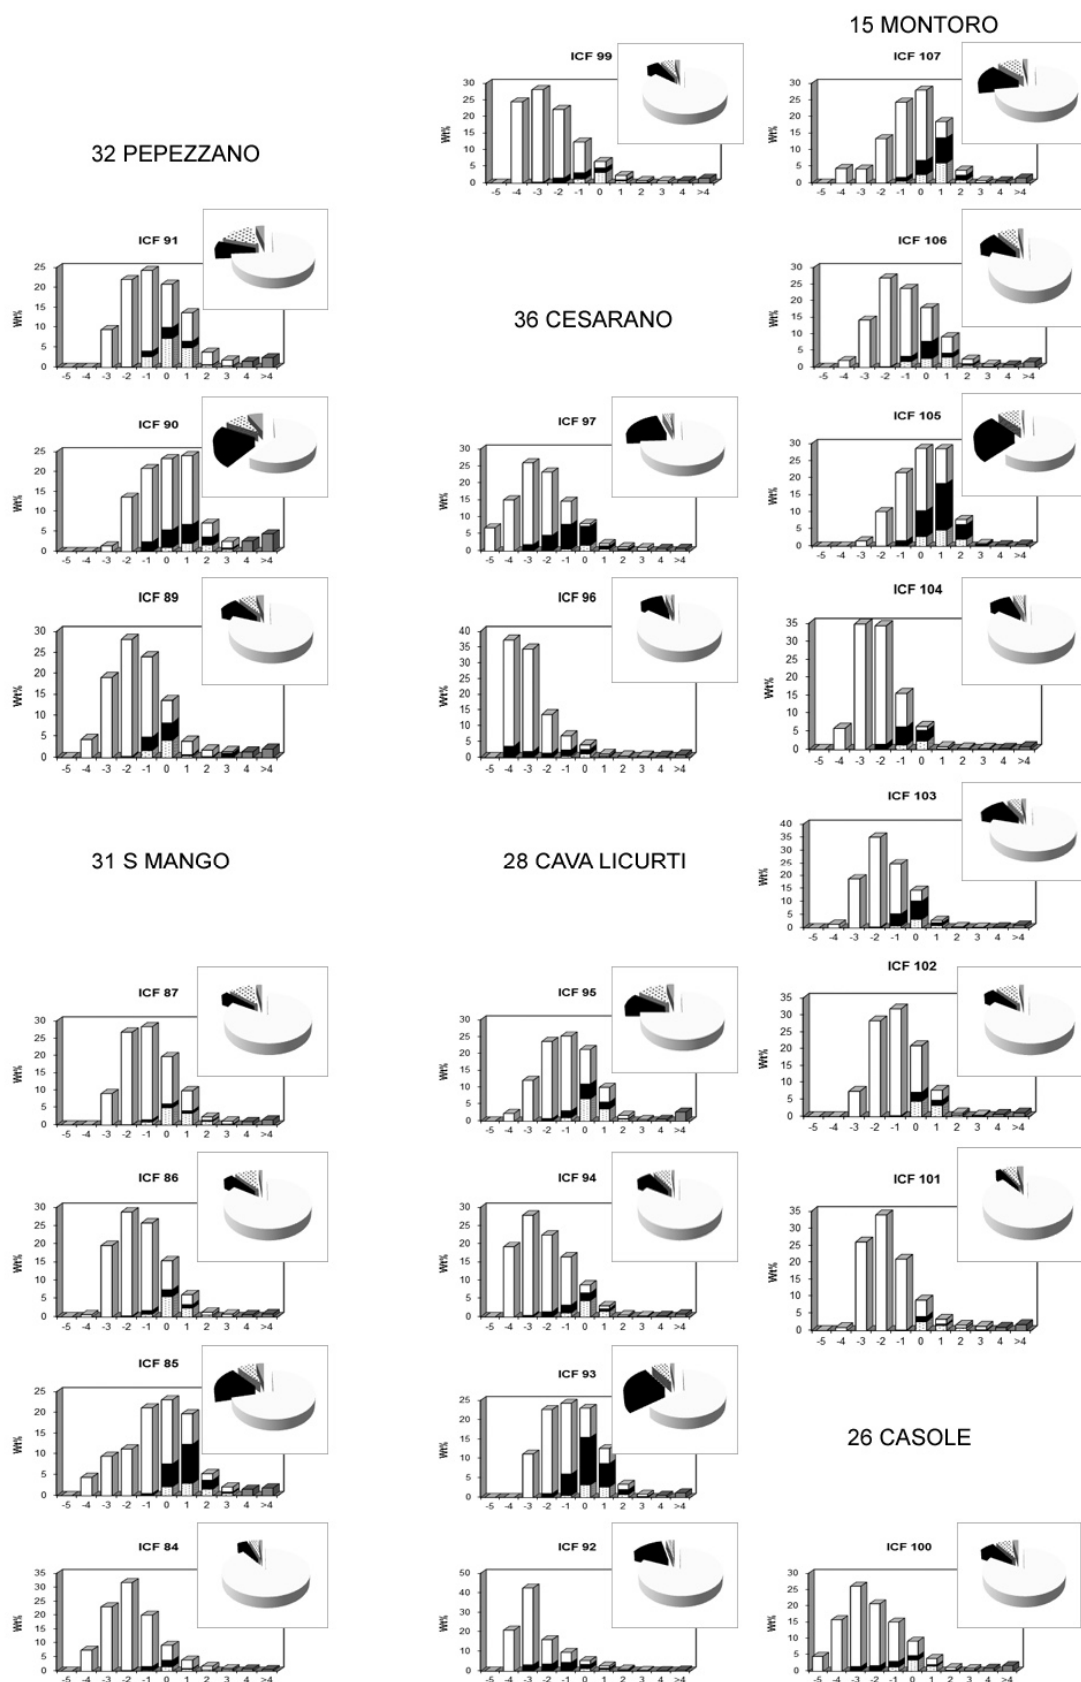

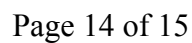

# 1 MOIANO

## ICF 39

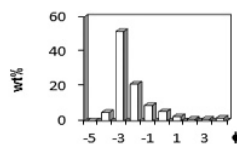

## 23 COLOGNA

### ICF 38

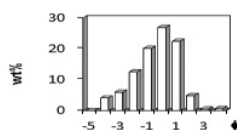

## 45 GROTAM.

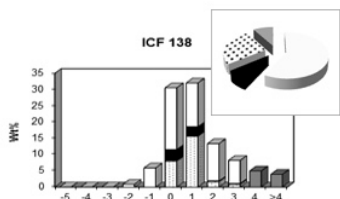

## 44 S MANGO C.

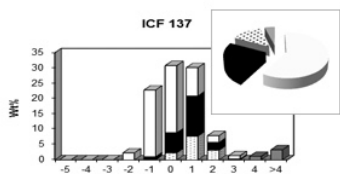

### ICF 37

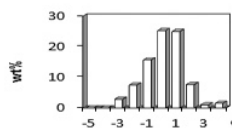

### ICF 136

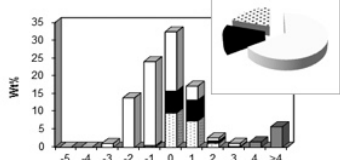

### ICF 36

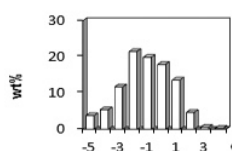

### ICF 135

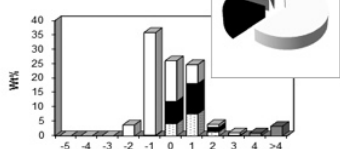

### ICF 35

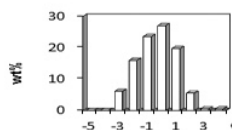

### ICF 134

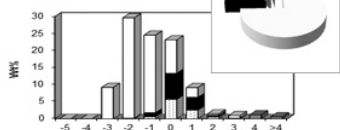

### ICF 133

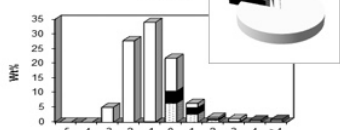

### ICF 34

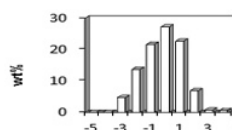

## 4 ALTAVILLA

### ICF 63

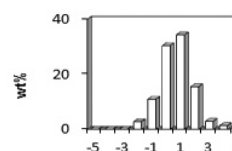

Supplement: Supplementary file 1 [file 23300390]
